# Supplementary material for: Organic pollutants in compost and digestate. : Part 2. Polychlorinated dibenzo-p-dioxins, and -furans, dioxin-like polychlorinated biphenyls, brominated flame retardants, perfluorinated alkyl substances, pesticides, and other compounds
Source: Royal Society of Chemistry journal article supplement (doi:10.1039/b617103f), 2007-01-01
Supplement: b617103f.pdf [file b617103f.pdf]

## Supporting Information to the Manuscript

### Organic pollutants in compost and digestate; 2. Polychlorinated Dibenzo-*p*-dioxins, and -furans, dioxin-like polychlorinated biphenyls, brominated flame retardants, perfluorinated alkyl substances, pesticides, and other compounds

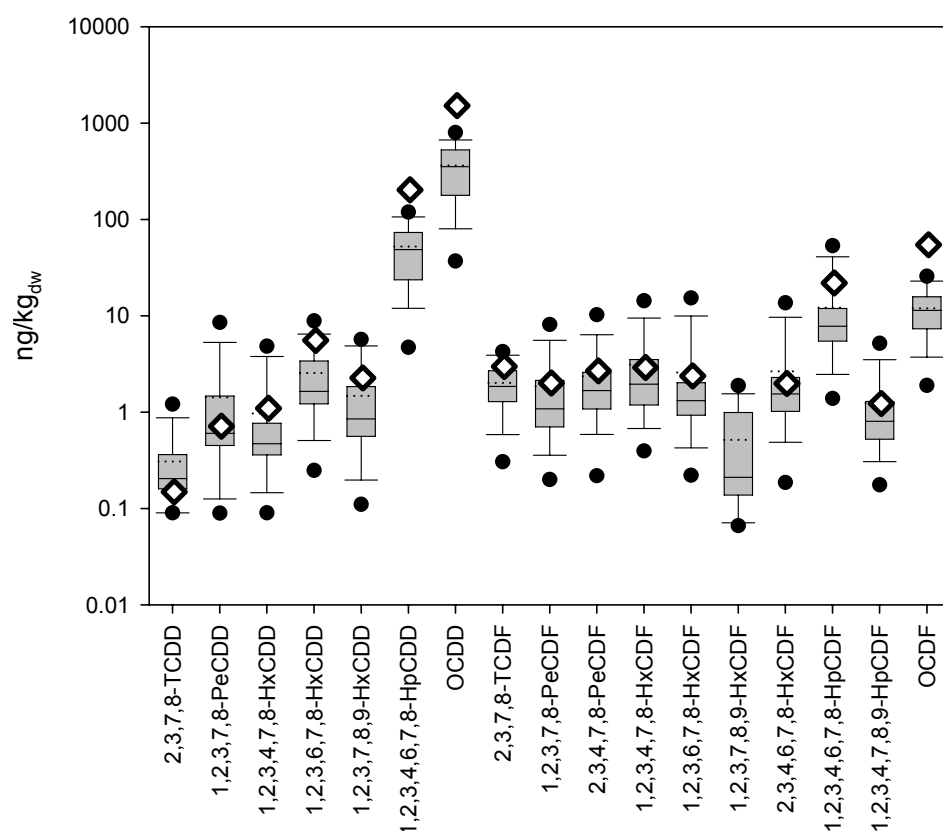

Figure S1: PCDD/F single compounds concentrations in Swiss compost and digestate (line: median, dotted line: mean, box: 25 and 75 percentile, whiskers: 10 and 90 percentile, circles: outliers) and corresponding literature values (diamonds).

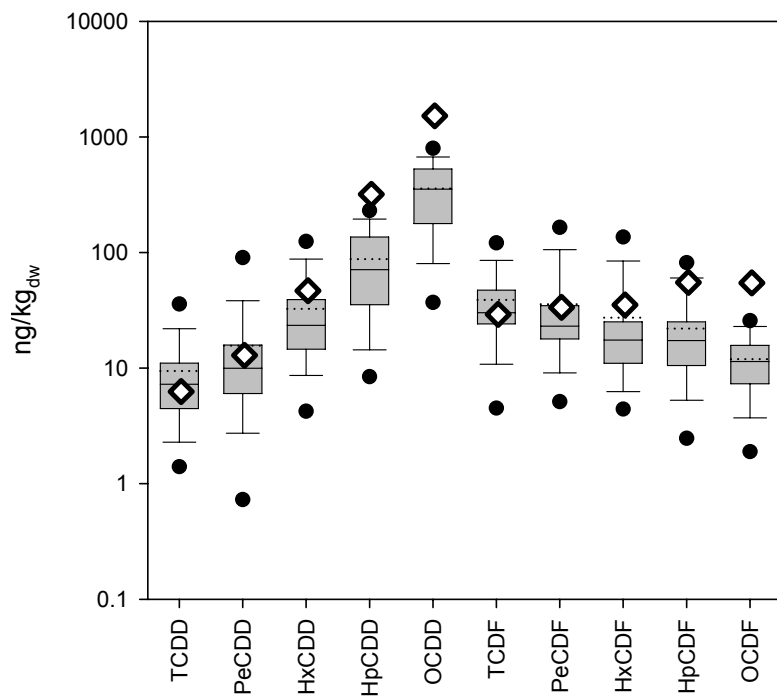

Figure S2: sum all tetra, penta, hexa, hepta, octa PCDD/F in Swiss compost and digestate (line: median, dotted line: mean, box: 25 and 75 percentile, whiskers: 10 and 90 percentile, circles: outliers) and corresponding literature values (diamonds).

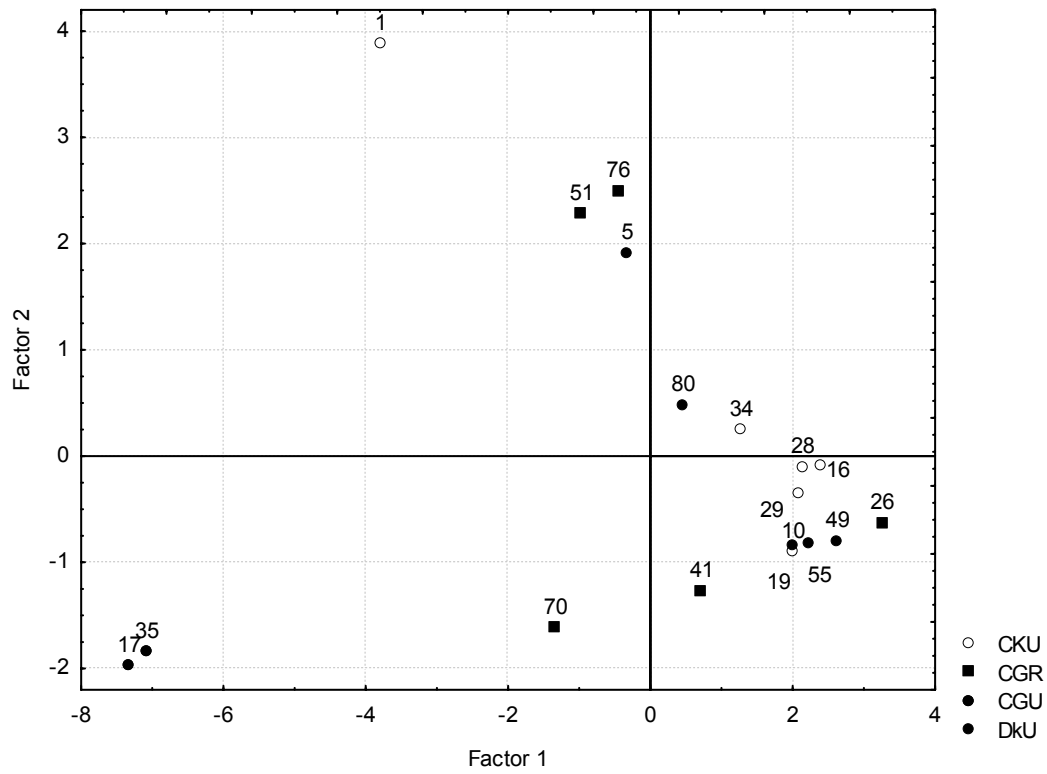

Figure S3: Factor 1 and 2 of the PCA of the PCDD/F ratios (sums of tetra to octa PCDD/Fs to the total sum) in Swiss compost and digestate (CKU: compost containing kitchen waste originating from urban areas, CGR: compost derived from greenwaste originating from rural areas, CGU: compost derived from greenwaste originating from urban areas, DKU: digestate containing kitchen waste originating from urban areas).

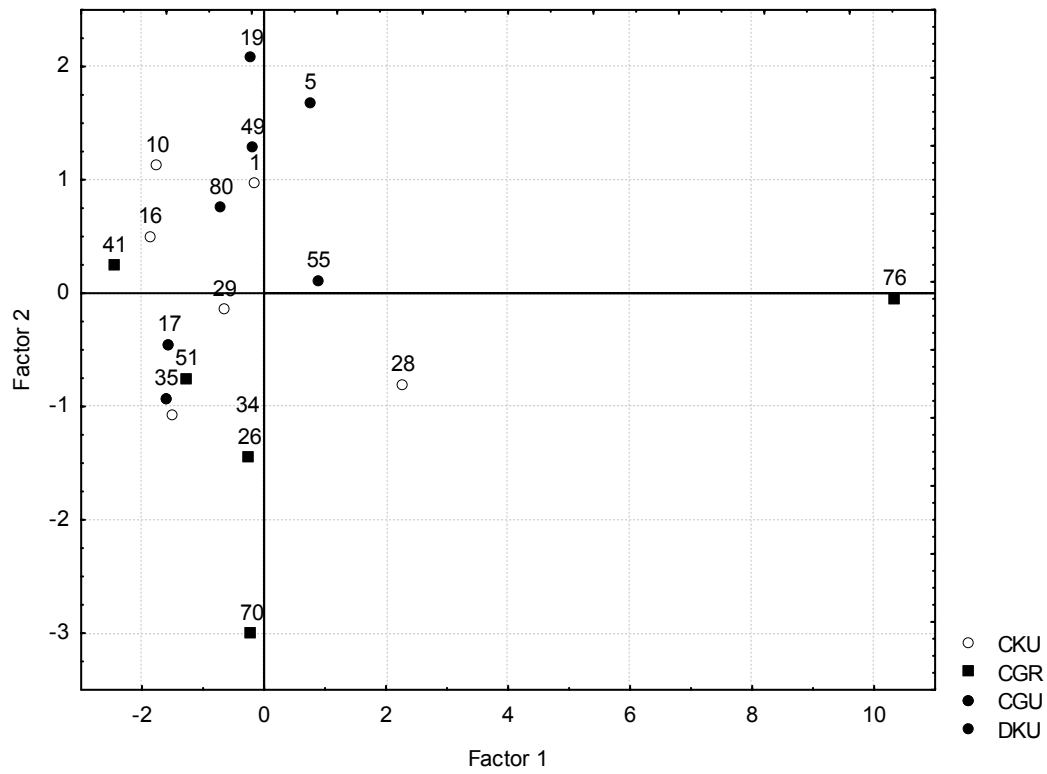

Figure S4: Factor 1 and 2 of the PCA of the dioxin-like PCB ratios (single congeners/total sum) in Swiss compost and digestate (CKU: compost containing kitchen waste originating from urban areas, CGR: compost derived from greenwaste originating from rural areas, CGU: compost derived from greenwaste originating from urban areas, DKU: digestate containing kitchen waste originating from urban areas).

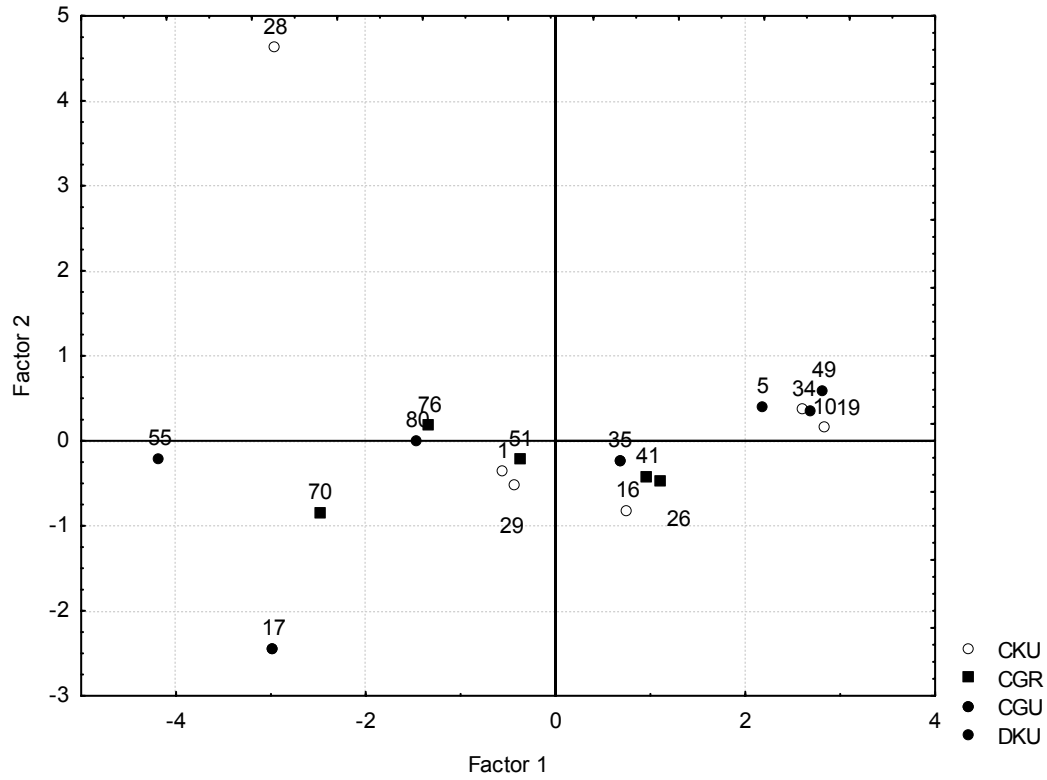

Figure S5: Factor 1 and 2 of the PCA of the polybrominated diphenyl ether ratios (single compound/total sum) in Swiss compost and digestate (CKU: compost containing kitchen waste originating from urban areas, CGR: compost derived from greenwaste originating from rural areas, CGU: compost derived from greenwaste originating from urban areas, DKU: digestate containing kitchen waste originating from urban areas).

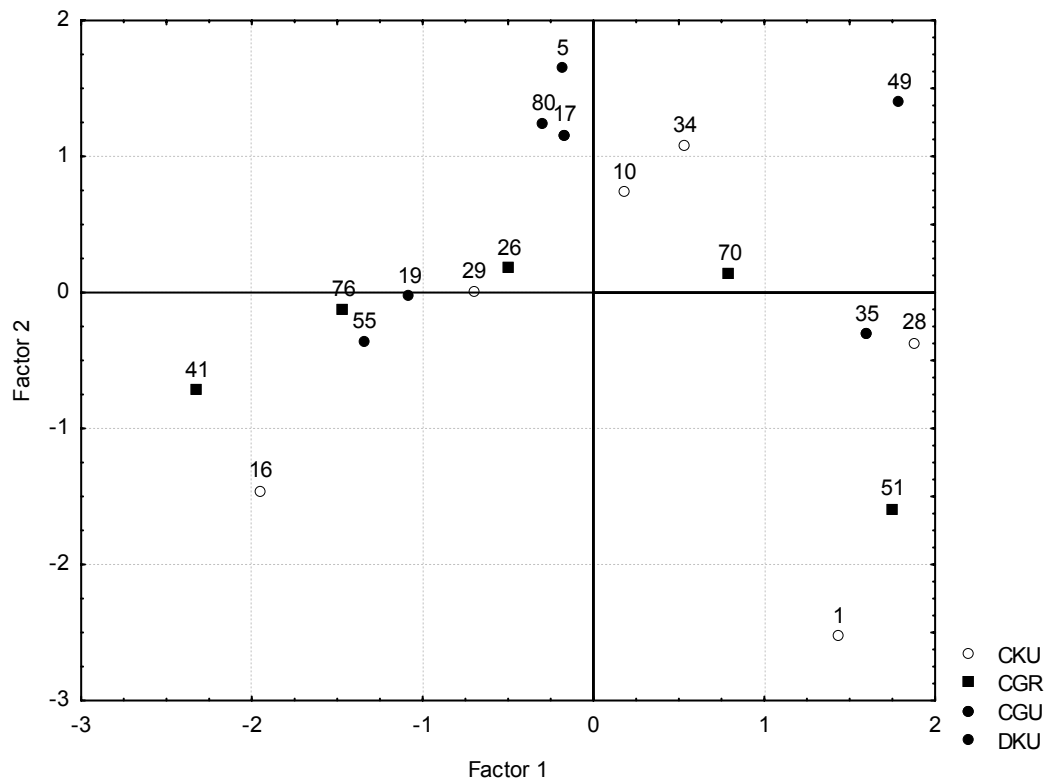

Figure S6: Factor 1 and 2 of the PCA of the polyfluorinated alkyl substances ratios (6:2 fluorotelomer sulfonate, perfluorinated sulfonates, perfluorinated carboxylates, and perfluorooctane sulfonamide to the total sum) of in Swiss compost and digestate (CKU: compost containing kitchen waste originating from urban areas, CGR: compost derived from greenwaste originating from rural areas, CGU: compost derived from greenwaste originating from urban areas, DKU: digestate containing kitchen waste originating from urban areas).

Table S1: Limit and guide values respectively for organic pollutants in compost in different European countries <sup>1,2</sup>

|                     | Austria                                              | Denmark                          | Luxemburg              | Switzerland                  |
|---------------------|------------------------------------------------------|----------------------------------|------------------------|------------------------------|
| PCDD/F <sup>a</sup> | 50 ng I-TEQ/kg <sub>dw</sub>                         |                                  | 20 ng/kg <sub>dw</sub> | 20 ng I-TEQ/kg <sub>dw</sub> |
| AOX <sup>b</sup>    | 500 mg/kg <sub>dw</sub>                              |                                  |                        |                              |
| Hydrocarbons        | 3000 mg/kg <sub>dw</sub>                             |                                  |                        |                              |
| LAS <sup>c</sup>    |                                                      | 1300 mg/kg <sub>dw</sub>         |                        |                              |
| NPE <sup>d</sup>    |                                                      | 30 mg/kg <sub>dw</sub>           |                        |                              |
| DEHP <sup>e</sup>   |                                                      | 50 mg/kg <sub>dw</sub>           |                        |                              |
| Remarks             | Limit values for mixed municipal solid waste compost | Limit value for biowaste compost | guide value            | guide value                  |

<sup>a</sup>PCDD/F: polychlorinated dibenzo-p-dioxins/furans, sum of the 17 2,3,7,8-chlorosubstituted PCDD/F; <sup>b</sup>AOX: absorbable organic halogens; <sup>c</sup>LAS: linear alkylbenzene sulphonates; <sup>d</sup>NPE: nonylphenol and -ethoxylates; <sup>e</sup>DEHP: di (2-ethylhexyl) phthalate

In some countries such as Austria, Germany, the Netherlands, Sweden and Belgium, voluntary quality assurance systems have been established <sup>1</sup>

Table S2: Organic pollutant contents of compost and digestate samples in Switzerland

| Sample No.                            | 1             | 5             | 10     | 16     | 17     | 19     | 26     | 28     | 29         |
|---------------------------------------|---------------|---------------|--------|--------|--------|--------|--------|--------|------------|
| Product <sup>a</sup>                  | Com           | Dig           | Com    | Com    | Com    | Dig    | Com    | Com    | Com        |
| Plant type and number <sup>b</sup>    | CKU1          | DKU1          | CKU2   | CKU4   | CGU4   | DKU2   | CGR04  | CKU02  | CKU01      |
| Input material <sup>c</sup>           | kw, gw,<br>iw | kw, gw,<br>iw | kw, gw | kw, gw | gw     | kw, gw | gw     | kw, gw | kw, gw, iw |
| Origin of input material <sup>d</sup> | urban         | urban         | urban  | urban  | urban  | urban  | rural  | urban  | urban      |
| Season <sup>e</sup>                   | winter        | winter        | winter | autumn | winter | winter | autumn | summer | summer     |
| Plant type <sup>f</sup>               | twl           | tad           | ab     | twl    | tbw    | tad    | twl    | ab     | twl        |
| Process duration (d) <sup>f</sup>     | 53            | 42            | 77     | 210    | 127    | 105    | 203    | 55     | 50         |
| Water content [% ww]                  | 50            | 49            | 45     | 47     | 53     | 45     | 40     | 45     | 49         |
| Org matter content [% dw]             | 62            | 46            | 57     | 41     | 40     | 42     | 27     | 51     | 51         |
| <b>PCDD/F (ng/kg<sub>dw</sub>)</b>    |               |               |        |        |        |        |        |        |            |
| 2,3,7,8-TCDD                          | 0.17          | 0.14          | 0.21   | 0.85   | 1.2    | 0.26   | 0.18   | 0.22   | 0.20       |
| 1,2,3,7,8-PeCDD                       | 0.33          | 0.54          | 0.95   | 0.83   | 8.8    | 1.6    | 0.58   | 0.49   | 0.61       |
| 1,2,3,4,7,8-HxCDD                     | 0.22          | 0.44          | 0.47   | 0.69   | 5.0    | 0.66   | 0.41   | 0.45   | 0.47       |
| 1,2,3,6,7,8-HxCDD                     | 1.0           | 1.3           | 2.3    | 2.8    | 9.1    | 3.8    | 1.3    | 1.3    | 1.5        |
| 1,2,3,7,8,9-HxCDD                     | 0.37          | 0.74          | 1.1    | 1.5    | 5.9    | 1.8    | 0.87   | 0.82   | 0.83       |
| 1,2,3,4,6,7,8-HpCDD                   | 13            | 24            | 65     | 70     | 120    | 110    | 39     | 33     | 44         |
| OCDD                                  | 85            | 210           | 410    | 510    | 820    | 660    | 360    | 290    | 310        |
| 2,3,7,8-TCDF                          | 1.2           | 2.0           | 2.2    | 2.0    | 4.4    | 3.9    | 1.3    | 1.9    | 1.6        |
| 1,2,3,7,8-PeCDF                       | 0.76          | 1.4           | 1.9    | 1.6    | 8.4    | 3.1    | 1.0    | 0.75   | 0.88       |
| 2,3,4,7,8-PeCDF                       | 0.75          | 1.5           | 1.7    | 1.9    | 11     | 2.8    | 1.1    | 0.96   | 1.4        |
| 1,2,3,4,7,8-HxCDF                     | 1.5           | 2.4           | 2.9    | 3.3    | 15     | 4.8    | 1.0    | 2.2    | 1.6        |
| 1,2,3,6,7,8-HxCDF                     | 0.66          | 1.1           | 1.2    | 1.7    | 16     | 1.9    | 1.0    | 1.4    | 1.3        |
| 1,2,3,7,8,9-HxCDF                     | 0.14          | 0.20          | 1.2    | 0.21   | 1.2    | 1.9    | 0.21   | 0.12   | 0.22       |
| 2,3,4,6,7,8-HxCDF                     | 0.76          | 1.1           | 1.4    | 1.7    | 14     | 2.3    | 1.2    | 1.6    | 1.7        |
| 1,2,3,4,6,7,8-HpCDF                   | 4.9           | 6.4           | 7.5    | 10     | 55     | 12     | 7.6    | 5.8    | 8.0        |
| 1,2,3,4,7,8,9-HpCDF                   | 0.32          | 0.63          | 0.87   | 0.96   | 5.3    | 1.4    | 0.77   | 0.84   | 0.68       |
| OCDF                                  | 6.6           | 11            | 12     | 15     | 27     | 19     | 10     | 7.6    | 11         |
| Σ17PCDD/F (I-TEQ)                     | 1.6           | 2.7           | 3.9    | 5.0    | 21     | 6.6    | 2.6    | 2.7    | 3.0        |
| Sum TCDD                              | 3.8           | 4.7           | 9.6    | 9.5    | 37     | 11     | 5.5    | 6.6    | 11         |
| Sum PeCDD                             | 6.4           | 9.7           | 9.9    | 17     | 93     | 16     | 6.3    | 5.4    | 13         |
| Sum HxCDD                             | 11            | 16            | 25     | 40     | 130    | 39     | 17     | 16     | 26         |
| Sum HpCDD                             | 24            | 47            | 120    | 140    | 240    | 190    | 65     | 44     | 77         |
| Sum TCDF                              | 27            | 31            | 36     | 37     | 120    | 57     | 20     | 28     | 34         |
| Sum PeCDF                             | 12            | 20            | 23     | 31     | 170    | 36     | 20     | 24     | 27         |
| Sum HxCDF                             | 9.4           | 11            | 16     | 22     | 140    | 25     | 16     | 17     | 18         |
| Sum HpCDF                             | 8.3           | 12            | 20     | 19     | 84     | 33     | 14     | 11     | 17         |
| <b>DL-PCB (µg/kg<sub>dw</sub>)</b>    |               |               |        |        |        |        |        |        |            |
| PCB 77                                | 0.067         | 0.12          | 0.25   | 0.29   | 0.21   | 0.23   | 0.058  | 0.071  | 0.097      |
| PCB 81                                | 0.0024        | 0.0041        | 0.0082 | 0.0088 | 0.0073 | 0.0076 | 0.0018 | 0.0030 | 0.0037     |
| PCB 105                               | 0.77          | 2.2           | 2.6    | 2.5    | 2.3    | 3.9    | 0.65   | 0.75   | 1.2        |
| PCB 114                               | 0.034         | 0.090         | 0.098  | 0.12   | 0.11   | 0.18   | 0.032  | 0.035  | 0.060      |
| PCB 118                               | 2.1           | 5.0           | 5.8    | 5.6    | 5.5    | 9.1    | 1.6    | 2.1    | 3.0        |
| PCB 123                               | 0.15          | 0.37          | 0.40   | 0.49   | 0.43   | 0.67   | 0.060  | 0.15   | 0.13       |
| PCB 126                               | 0.012         | 0.024         | 0.035  | 0.047  | 0.043  | 0.044  | 0.013  | 0.015  | 0.018      |
| PCB 156                               | 0.36          | 0.97          | 0.73   | 0.88   | 0.81   | 1.5    | 0.28   | 0.57   | 0.50       |
| PCB 157                               | 0.07          | 0.18          | 0.18   | 0.18   | 0.19   | 0.28   | 0.060  | 0.090  | 0.10       |
| PCB 167                               | 0.16          | 0.40          | 0.29   | 0.40   | 0.36   | 0.64   | 0.14   | 0.27   | 0.24       |
| PCB 169                               | 0.0011        | 0.0024        | 0.0025 | 0.0029 | 0.0049 | 0.0037 | 0.0012 | 0.0016 | 0.0018     |
| PCB 189                               | 0.039         | 0.12          | 0.060  | 0.075  | 0.066  | 0.14   | 0.039  | 0.10   | 0.053      |
| Σ12PCB (WHO-TEQ)                      | 1.8           | 3.9           | 5.0    | 6.3    | 5.8    | 6.8    | 1.7    | 2.2    | 2.6        |
| <b>BFR (µg/kg<sub>dw</sub>)</b>       |               |               |        |        |        |        |        |        |            |
| BDE 28                                | 0.013         | 0.023         | 0.030  | 0.052  | 0.13   | 0.031  | 0.015  | 0.013  | 0.022      |
| BDE 47                                | 0.59          | 0.63          | 0.84   | 1.5    | 1.3    | 1.3    | 0.45   | 0.56   | 1.0        |
| BDE 99                                | 0.78          | 0.69          | 0.84   | 0.64   | 0.87   | 1.3    | 0.32   | 0.76   | 1.3        |
| BDE 100                               | 0.17          | 0.15          | 0.18   | 0.29   | 0.28   | 0.32   | 0.11   | 0.15   | 0.29       |
| BDE 153                               | 0.067         | 0.10          | 0.074  | 0.10   | 0.13   | 0.16   | 0.040  | 0.29   | 0.11       |
| BDE 154                               | 0.080         | 0.082         | 0.090  | 0.15   | 0.16   | 0.17   | 0.032  | 0.12   | 0.10       |
| BDE 183                               | 0.049         | 0.087         | 0.056  | 0.11   | 0.11   | 0.11   | 0.038  | 1.2    | 0.042      |
| BDE 209                               | 5.2           | 10            | 14     | 12     | 6.9    | 22     | 4.2    | 4.8    | 8.3        |
| HBCD                                  | 21            | 170           | 190    | 26     | 47     | 110    | 230    | 140    | 35         |
| TBBPA                                 | 1.4           | 1.5           | 0.51   | 2.3    | 1.4    | 0.63   | 0.065  | 0.52   | 0.57       |



**PFAS ( $\mu\text{g}/\text{kg}_{\text{dw}}$ )<sup>6</sup>**

|         |       |       |       |      |      |       |       |      |      |
|---------|-------|-------|-------|------|------|-------|-------|------|------|
| 6:2 FTS | 1.4   | nd    | nd    | 1.5  | nd   | nd    | nd    | 1.4  | nd   |
| PFHxS   | 0.070 | 0.13  | 0.080 | 2.2  | 0.33 | 0.39  | 0.090 | nd   | 0.17 |
| PFOS    | 1.2   | 2.1   | 1.4   | 21   | 3.6  | 8.2   | 2.1   | 1.0  | 2.1  |
| PFDcS   | nd    | 0.070 | nd    | 0.31 | nd   | 0.050 | nd    | nd   | nd   |
| PFHxA   | 0.30  | 0.68  | 0.24  | 2.1  | 0.97 | 1.1   | 0.19  | 0.33 | 0.71 |
| PFHpA   | nd    | 0.19  | nd    | 0.81 | 0.49 | 0.60  | 0.50  | 0.36 | nd   |
| PFOA    | 0.67  | 1.3   | 1     | 3.6  | 1.6  | 2.5   | 1.2   | 0.77 | 1.0  |
| PFNA    | 0.28  | 0.27  | 0.29  | 0.91 | 0.36 | 0.60  | 0.23  | nd   | 0.21 |
| PFDcA   | nd    | 0.66  | 0.39  | 1.7  | 0.85 | 1.4   | nd    | 0.50 | nd   |
| PFUnA   | nd    | nd    | nd    | 0.31 | 0.26 | 0.29  | nd    | nd   | nd   |
| PFDoA   | nd    | nd    | nd    | 0.37 | 0.24 | 0.16  | nd    | 0.20 | nd   |
| PFOSA   | nd    | 0.37  | nd    | 0.20 | 0.34 | 0.23  | nd    | 0.26 | nd   |

**Pesticides ( $\mu\text{g}/\text{kg}_{\text{dw}}$ )**

|                          |     |     |     |     |     |     |     |     |     |
|--------------------------|-----|-----|-----|-----|-----|-----|-----|-----|-----|
| atrazine-2-hydroxy       | nd  | 1.1 | 1.0 |
| azaconazole              | nd  | 6.3 |
| azoxystrobin             | 6.4 | nd  | 7.5 | nd  | nd  | nd  | nd  | 2.1 | 3.1 |
| bitertanol               | nd  | 2.1 | 1.0 |
| bromacil                 | nd  | 2.1 | nd  |
| buprofezin               | nd  | 1.1 | 1.1 | nd  | nd  | nd  | nd  | nd  | nd  |
| carbendazim              | nd  | 1.1 | nd  |
| cyproconazole            | nd  | 1.1 | 1.1 | 3.2 | 1.1 | 1.1 | 1.1 | nd  | 3.1 |
| cyprodinil               | 1.1 | 7.4 | 2.1 | 1.1 | nd  | nd  | nd  | 1.1 | 1.0 |
| difenoconazole           | 2.2 | 2.1 | 3.2 | 3.2 | 2.1 | 2.1 | 4.2 | 3.2 | 3.1 |
| diuron                   | nd  | 1.1 | nd  | 5.3 | nd  | nd  | nd  | nd  | nd  |
| dimethomorph             | nd  | nd  | 17  | nd  | nd  | nd  | nd  | 1.1 | nd  |
| dodemorph                | nd  | 2.1 | 2.1 |
| epoxiconazole            | nd  |
| etaconazole              | nd  |
| fenbuconazole            | 1.1 | 2.1 | 2.1 | 5.3 | 3.2 | 2.1 | 2.1 | 3.2 | 2.1 |
| fenhexamide              | nd  | 6.3 | nd  | nd  | nd  | nd  | nd  | 1.1 | 1.0 |
| fenoxycarb               | nd  |
| fenpropathrin            | nd  |
| fenpropimorph            | nd  | 2.1 | nd  |
| fenpyroximat             | nd  |
| flusilazole              | na  | na  | na  | na  | na  | na  | 1.1 | nd  | nd  |
| flutolanil               | na  | na  | na  | na  | na  | na  | nd  | nd  | nd  |
| imazalil                 | 8.6 | 79  | 99  | 17  | 9.5 | 8.5 | nd  | 24  | 5.2 |
| mecoprop                 | nd  | 3.2 | nd  |
| metamitron               | nd  |
| methabenzthiazuron       | nd  |
| metolcarb                | nd  | 1.0 |
| myclobutanil             | nd  | 1.1 | 2.1 | 6.3 | 2.1 | 2.1 | nd  | 1.1 | 1.0 |
| oryzalin                 | nd  | 3.2 | nd  |
| oxadiazon                | nd  | 1.1 | 2.1 | 1.1 | nd  | nd  | nd  | 3.2 | nd  |
| oxadixyl                 | nd  |
| prochloraz               | nd  | 3.2 | nd  |
| propiconazole            | 1.1 | 5.3 | 2.1 | 1.1 | 1.1 | 4.3 | 2.1 | 5.3 | 3.1 |
| propoxur                 | nd  | nd  | nd  | nd  | nd  | nd  | 7.4 | 4.2 | 5.2 |
| propyzamide              | nd  | 1.1 | nd  |
| pyridaben                | nd  |
| pyrifenox                | nd  | 1.1 | nd  |
| pyrimethanil             | nd  | 6.3 | nd  |
| pyriproxyfen             | nd  |
| simazin                  | nd  | nd  | nd  | 3.2 | nd  | nd  | nd  | nd  | nd  |
| spiroxamine              | nd  | 3.2 | nd  |
| tebuconazole             | 2.2 | 5.3 | 8.6 | 3.2 | 1.1 | 5.3 | 1.1 | 3.2 | 3.1 |
| tebufenpyrad             | nd  | nd  | nd  | nd  | 1.1 | nd  | nd  | nd  | nd  |
| terbufeton               | nd  | 1.1 | nd  |
| terbuthylazine-2-hydroxy | nd  | 1.1 | 1.1 | 1.1 | 1.1 | nd  | nd  | 1.1 | nd  |
| terbutryn                | nd  | 1.1 | nd  |
| tetraconazole            | nd  |
| thiabendazole            | 2.2 | 23  | 23  | 5.3 | 2.1 | 4.3 | nd  | 13  | 2.1 |
| thiophanate ethyl        | nd  |
| triadimefon              | nd  |
| triadimenol              | nd  | nd  | nd  | nd  | nd  | nd  | 1.1 | 3.2 | 2.1 |
| triasulfuron             | nd  |

**Phthalates ( $\mu\text{g}/\text{kg}_{\text{dw}}$ )**

|      |     |      |     |     |     |     |    |    |    |
|------|-----|------|-----|-----|-----|-----|----|----|----|
| DEHP | 270 | 1980 | 150 | 390 | 160 | 300 | na | na | na |
| DBP  | nd  | 110  | nd  | nd  | nd  | nd  | na | na | na |

**Nonylphenol ( $\mu\text{g}/\text{kg}_{\text{dw}}$ )**

|  |    |    |    |    |    |    |    |    |    |
|--|----|----|----|----|----|----|----|----|----|
|  | nd | nd | nd | nd | nd | nd | na | na | na |
|--|----|----|----|----|----|----|----|----|----|

CP ( $\mu\text{g}/\text{kg}_{\text{dw}}$ )

|         |      |    |      |      |    |    |    |    |    |
|---------|------|----|------|------|----|----|----|----|----|
| SCCP    |      |    |      |      |    |    |    |    |    |
| C10C15  | nd   | na | nd   | nd   | na | na | na | na | na |
| C10C16  | 1.1  | na | 1.3  | 1.0  | na | na | na | na | na |
| C10C17  | 4.5  | na | 5.7  | 1.9  | na | na | na | na | na |
| C10C18  | 2.1  | na | 4.9  | 1.0  | na | na | na | na | na |
| C10C19  | 0.79 | na | 0.78 | 0.53 | na | na | na | na | na |
| C10C110 | 0.02 | na | 0.66 | nd   | na | na | na | na | na |
| C10C111 | nd   | na | nd   | nd   | na | na | na | na | na |
|         |      |    |      |      |    |    |    |    |    |
| C11C15  | 1.3  | na | 2.4  | nd   | na | na | na | na | na |
| C11C16  | 28   | na | 4.8  | 2.5  | na | na | na | na | na |
| C11C17  | 16   | na | 20   | 8.7  | na | na | na | na | na |
| C11C18  | 11   | na | 17   | 3.7  | na | na | na | na | na |
| C11C19  | 3.1  | na | 6.2  | 1.2  | na | na | na | na | na |
| C11C110 | 0.85 | na | 2.2  | 0.52 | na | na | na | na | na |
|         |      |    |      |      |    |    |    |    |    |
| C12C15  | 2.4  | na | nd   | nd   | na | na | na | na | na |
| C12C16  | 2.8  | na | 3.3  | 3.8  | na | na | na | na | na |
| C12C17  | 7.6  | na | 9.8  | 5.6  | na | na | na | na | na |
| C12C18  | 10   | na | 15   | 4.7  | na | na | na | na | na |
| C12C19  | 5.2  | na | 11   | 1.7  | na | na | na | na | na |
| C12C110 | 1.2  | na | 4.3  | 1.3  | na | na | na | na | na |
|         |      |    |      |      |    |    |    |    |    |
| C13C15  | 2.2  | na | 2.5  | 2.6  | na | na | na | na | na |
| C13C16  | 2.5  | na | 3.3  | 4.2  | na | na | na | na | na |
| C13C17  | 5.4  | na | 8.1  | 5.6  | na | na | na | na | na |
| C13C18  | 4.5  | na | 9.9  | 3.9  | na | na | na | na | na |
| C13C19  | 2.7  | na | 5.4  | 1.6  | na | na | na | na | na |
| C13C110 | 0.78 | na | 1.8  | 0.51 | na | na | na | na | na |
|         |      |    |      |      |    |    |    |    |    |
| MCCP    |      |    |      |      |    |    |    |    |    |
| C14C15  | nd   | na | nd   | nd   | na | na | na | na | na |
| C14C16  | 3.0  | na | 12   | 15   | na | na | na | na | na |
| C14C17  | 7.4  | na | 51   | 39   | na | na | na | na | na |
| C14C18  | 9.8  | na | 79   | 43   | na | na | na | na | na |
| C14C19  | 6.2  | na | 50   | 23   | na | na | na | na | na |
| C14C110 | nd   | na | 17   | nd   | na | na | na | na | na |
|         |      |    |      |      |    |    |    |    |    |
| C15C15  | nd   | na | 0.46 | 0.50 |    |    |    |    |    |
| C15C16  | 0.57 | na | 2.5  | 2.2  | na | na | na | na | na |
| C15C17  | 0.85 | na | 6.5  | 3.5  | na | na | na | na | na |
| C15C18  | 0.48 | na | 5.8  | 2.0  | na | na | na | na | na |
| C15C19  | nd   | na | 2.9  | 0.69 | na | na | na | na | na |
| C15C110 | nd   | na | 0.62 | nd   | na | na | na | na | na |
|         |      |    |      |      |    |    |    |    |    |
| C16C15  | nd   | na | 0.48 | nd   | na | na | na | na | na |
| C16C16  | nd   | na | 1.2  | 1.2  | na | na | na | na | na |
| C16C17  | 0.36 | na | 3.0  | 2.3  | na | na | na | na | na |
| C16C18  | 0.24 | na | 3.3  | 1.7  | na | na | na | na | na |
| C16C19  | nd   | na | 1.8  | 0.65 | na | na | na | na | na |
| C16C110 | nd   | na | 0.63 | nd   | na | na | na | na | na |
|         |      |    |      |      |    |    |    |    |    |
| C17C15  | nd   | na | nd   | nd   | na | na | na | na | na |
| C17C16  | nd   | na | 1.0  | 0.83 | na | na | na | na | na |
| C17C17  | nd   | na | 1.6  | 1.0  | na | na | na | na | na |
| C17C18  | 0.13 | na | 2.1  | 0.92 | na | na | na | na | na |
| C17C19  | nd   | na | 1.2  | 0.35 | na | na | na | na | na |
| C17C110 | nd   | na | 0.41 | nd   | na | na | na | na | na |

- a) Com: compost, Dig: digestate, all digestate samples were submitted to subsequent aerobic treatment except for samples 80  
b) plant code: C: compost, K: organic kitchen waste and green waste as input materials, G: pure green waste compost, U: urban area of input material collection, R: rural area of input material collection  
c) kw: kitchen waste, gw: green waste, iw: industrial waste including paper sludge, coffee ground, tea leaves, residues from potato chips production, biodegradable plastics, edible oil, cacao  
d) characterisation of the area where the input material was collected  
e) season of input material collection  
f) plant type: ab: aerated boxes, tad: thermophilic aerobic digestion, tbw: table windrows, twh: triangle windrows higher than 2 meters, twl: triangle windrows lower than 2 meters  
g) duration of the degradation process in days

6 FTS: fluorotelomer sulfonate, PFHxS: perfluorohexane sulfonate, PFOS: perfluorooctane sulfonate, PFDcS: perfluorodecane sulfonate, PFHxA: perfluorohexanoate, PFHpA: perfluoroheptanoate, PFOA: perfluorooctanoate, PFNA: perfluorononanoate, PFDcA:

perfluorodecanoate, PFUnA: perfluoroundecanoate, PFDcA: perfluorododecanoate, PFOSA: perfluorooctane sulphonamide, na: not available, nd: not detected, ww: wet weight, dw: dry weight

PFAS below detection limit not listed, dedection limit for 6:2 fluorotelomer unsaturated carboxylate (FTUCA): 0.37µg/kg dw, 8:2 FTUCA: 0.4 µg/kg, 6:2 fluorotelomer carboxylate (FTCA): 0.37µg/kg, 8:2 FTCA: 0.4 µg/kg, perfluorobutane sulfonate: 0.33 µg/kg, n-Methyl-heptadecafluorooctane sulphonamide: <0.18 µg/kg dw, n-Ethyl-heptadecafluorooctane sulfonamide: <0.14 µg/kg dw, n-Methyl-heptadecafluorooctane sulfonamidoethanol: <0.14 µg/kg dw, n-Ethyl-heptadecafluorooctane sulfonamidoethanol: <0.28 µg/kg dw

Table S2: (cont.) Organic pollutant contents of compost and digestate samples in Switzerland

| Sample No.                            | 34            | 35     | 41     | 49            | 51      | 55      | 70     | 76     | 80     |
|---------------------------------------|---------------|--------|--------|---------------|---------|---------|--------|--------|--------|
| Product <sup>a</sup>                  | Com           | Com    | Com    | Dig           | Com     | Dig     | Com    | Com    | Dig    |
| Plant code and number <sup>b</sup>    | CKU04         | CGU04  | CGR02  | DKU01         | CGR04   | DKU02   | CGR03  | CGR01  | DKU03  |
| Input material <sup>c</sup>           | kw, gw,<br>iw | gw     | gw     | kw, gw,<br>iw | gw      | kw, gw  | gw     | gw     | kw, gw |
| Origin of input material <sup>d</sup> | urban         | urban  | rural  | urban         | rural   | urban   | rural  | rural  | urban  |
| Season <sup>e</sup>                   | summer        | summer | summer | summer        | summer  | summer  | autumn | winter | summer |
| Plant type <sup>f</sup>               | tbw           | twh    | twh    | tad           | twh     | tad     | twh    | twl    | tad    |
| Process duration (d) <sup>g</sup>     | 91            | 96     | 70     | 20            | 105     | 126     | 72     | 21     | 16     |
| Water content [% ww]                  | 37            | 43     | 51     | 44            | 32      | 34      | 53     | 39     | 52     |
| Org. matter content [% dw]            | 36            | 45     | 33     | 51            | 39      | 47      | 29     | 24     | 29     |
| <b>PCDD/F (ng/kg<sub>dw</sub>)</b>    |               |        |        |               |         |         |        |        |        |
| 2,3,7,8-TCDD                          | 0.17          | 0.49   | 0.32   | 0.21          | 0.09    | 0.09    | 0.49   | 0.10   | 0.17   |
| 1,2,3,7,8-PeCDD                       | 0.72          | 4.93   | 1.4    | 0.60          | 0.09    | 0.24    | 2.5    | 0.13   | 0.58   |
| 1,2,3,4,7,8-HxCDD                     | 0.68          | 3.66   | 1.0    | 0.52          | 0.09    | 0.15    | 2.0    | 0.20   | 0.47   |
| 1,2,3,6,7,8-HxCDD                     | 2.4           | 6.2    | 3.3    | 1.8           | 0.25    | 0.92    | 5.0    | 0.53   | 1.3    |
| 1,2,3,7,8,9-HxCDD                     | 1.0           | 4.8    | 1.9    | 0.62          | 0.11    | 0.37    | 3.1    | 0.21   | 0.74   |
| 1,2,3,4,6,7,8-HpCDD                   | 68            | 74     | 73     | 53            | 4.7     | 24      | 99     | 13     | 22     |
| OCDD                                  | 520           | 560    | 450    | 350           | 37      | 140     | 590    | 100    | 190    |
| 2,3,7,8-TCDF                          | 1.8           | 3.5    | 2.5    | 1.5           | 0.31    | 0.62    | 3.4    | 1.1    | 1.4    |
| 1,2,3,7,8-PeCDF                       | 0.99          | 5.3    | 1.8    | 1.2           | 0.20    | 0.37    | 3.1    | 0.51   | 0.56   |
| 2,3,4,7,8-PeCDF                       | 2.0           | 5.9    | 2.5    | 1.7           | 0.22    | 0.63    | 4.2    | 1.7    | 1.2    |
| 1,2,3,4,7,8-HxCDF                     | 1.6           | 8.9    | 2.4    | 1.2           | 0.39    | 0.71    | 4.2    | 1.7    | 0.95   |
| 1,2,3,6,7,8-HxCDF                     | 1.4           | 9.4    | 2.4    | 1.5           | 0.22    | 0.45    | 4.0    | 0.54   | 1.0    |
| 1,2,3,7,8,9-HxCDF                     | 0.38          | 1.5    | 0.42   | 0.21          | 0.066   | 0.071   | 0.93   | 0.13   | 0.19   |
| 2,3,4,6,7,8-HxCDF                     | 1.4           | 9.2    | 2.5    | 1.8           | 0.19    | 0.52    | 5.0    | 0.56   | 1.1    |
| 1,2,3,4,6,7,8-HpCDF                   | 9.7           | 40     | 12     | 9.2           | 1.4     | 2.9     | 21     | 2.6    | 5.67   |
| 1,2,3,4,7,8,9-HpCDF                   | 1.2           | 3.3    | 1.3    | 0.56          | 0.18    | 0.47    | 2.8    | 0.45   | 0.54   |
| OCDF                                  | 14            | 23     | 13     | 11            | 1.9     | 5.0     | 18     | 3.9    | 8.1    |
| Σ17PCDD/F (I-TEQ)                     | 4.0           | 13     | 5.3    | 3.3           | 0.5     | 1.3     | 8.6    | 1.8    | 2.3    |
| Sum TCDD                              | 7.9           | 20     | 13     | 5.0           | 1.4     | 3.1     | 16     | 2.4    | 5.1    |
| Sum PeCDD                             | 10            | 33     | 15     | 14            | 0.7     | 2.9     | 23     | 3.0    | 6.4    |
| Sum HxCDD                             | 25            | 84     | 37     | 22            | 4.2     | 10      | 63     | 9.1    | 18     |
| Sum HpCDD                             | 120           | 140    | 15     | 89            | 8.4     | 39      | 170    | 23     | 42     |
| Sum TCDF                              | 30            | 81     | 44     | 28            | 4.5     | 11      | 72     | 15     | 25     |
| Sum PeCDF                             | 28            | 99     | 34     | 22            | 5.1     | 9.5     | 53     | 18     | 18     |
| Sum HxCDF                             | 23            | 79     | 26     | 20            | 4.4     | 6.5     | 42     | 12     | 11     |
| Sum HpCDF                             | 19            | 58     | 23     | 18            | 2.5     | 6.4     | 37     | 5.6    | 12     |
| <b>DL-PCB (µg/kg<sub>dw</sub>)</b>    |               |        |        |               |         |         |        |        |        |
| PCB 77                                | 0.12          | 0.13   | 0.22   | 0.14          | 0.011   | 0.047   | 0.061  | 0.047  | 0.14   |
| PCB 81                                | 0.0040        | 0.0050 | 0.0085 | 0.0046        | 0.00048 | 0.0018  | 0.0022 | 0.0013 | 0.0049 |
| PCB 105                               | 1.2           | 1.6    | 1.7    | 1.9           | 0.14    | 0.77    | 0.62   | 0.95   | 1.8    |
| PCB 114                               | 0.054         | 0.072  | 0.090  | 0.089         | 0.0080  | 0.036   | 0.027  | 0.041  | 0.098  |
| PCB 118                               | 2.8           | 3.7    | 3.8    | 4.5           | 0.36    | 1.9     | 1.5    | 3.7    | 4.3    |
| PCB 123                               | 0.10          | 0.15   | 0.20   | 0.34          | 0.026   | 0.13    | 0.055  | 0.19   | 0.21   |
| PCB 126                               | 0.023         | 0.026  | 0.019  | 0.025         | 0.0028  | 0.018   | 0.013  | 0.0089 | 0.023  |
| PCB 156                               | 0.42          | 0.52   | 0.6    | 0.79          | 0.057   | 0.43    | 0.29   | 2.2    | 0.70   |
| PCB 157                               | 0.091         | 0.11   | 0.12   | 0.16          | 0.011   | 0.072   | 0.057  | 0.26   | 0.14   |
| PCB 167                               | 0.19          | 0.24   | 0.25   | 0.33          | 0.030   | 0.19    | 0.14   | 1.0    | 0.32   |
| PCB 169                               | 0.0015        | 0.0027 | 0.0016 | 0.0023        | 0.00034 | 0.00093 | 0.0016 | 0.0014 | 0.0018 |
| PCB 189                               | 0.038         | 0.049  | 0.057  | 0.077         | 0.0069  | 0.057   | 0.040  | 0.44   | 0.078  |
| Σ12PCB (WHO-TEQ)                      | 3.0           | 3.5    | 2.9    | 3.7           | 0.38    | 2.4     | 1.8    | 2.7    | 3.4    |
| <b>BFR (µg/kg<sub>dw</sub>)</b>       |               |        |        |               |         |         |        |        |        |
| BDE 28                                | 0.018         | 0.022  | 0.013  | 0.027         | 0.0031  | 0.0079  | 0.031  | 0.0073 | 0.031  |
| BDE 47                                | 0.63          | 1.1    | 0.58   | 1.4           | 0.068   | 0.36    | 1.2    | 0.36   | 0.63   |
| BDE 99                                | 0.51          | 1.2    | 0.46   | 2.0           | 0.070   | 0.50    | 1.3    | 0.51   | 0.66   |
| BDE 100                               | 0.13          | 0.27   | 0.13   | 0.43          | 0.015   | 0.10    | 0.36   | 0.091  | 0.13   |
| BDE 153                               | 0.067         | 0.11   | 0.048  | 0.25          | 0.0079  | 0.063   | 0.16   | 0.069  | 0.11   |
| BDE 154                               | 0.051         | 0.095  | 0.046  | 0.22          | 0.007   | 0.043   | 0.19   | 0.035  | 0.064  |
| BDE 183                               | 0.14          | 0.071  | 0.037  | 0.13          | 0.019   | 0.081   | 0.060  | 0.046  | 0.19   |
| BDE 209                               | 9.0           | 10     | 5.2    | 31            | 0.55    | 1.7     | 7.8    | 2.6    | 4.3    |
| HBCD                                  | 17            | 45     | 100    | 98            | 22      | 180     | 67     | 140    | 370    |
| TBBPA                                 | 0.22          | 0.50   | 0.11   | 1.0           | 0.36    | 0.44    | 0.10   | 0.38   | 0.98   |

**PFAS ( $\mu\text{g}/\text{kg}_{\text{dw}}$ )<sup>6</sup>**

|         |       |       |      |      |      |       |      |       |      |
|---------|-------|-------|------|------|------|-------|------|-------|------|
| 6:2 FTS | 0.46  | 1.2   | nd   | 0.48 | 1.5  | 0.36  | 0.97 | nd    | nd   |
| PFHxS   | 0.41  | 0.080 | 0.16 | 0.11 | 0.10 | 0.35  | 0.16 | 0.14  | 0.12 |
| PFOS    | 4.0   | 1.8   | 4.0  | 2.1  | 1.3  | 3.7   | 2.5  | 6.0   | 1.9  |
| PFDcS   | 0.050 | nd    | nd   | 0.10 | nd   | 0.070 | nd   | 0.080 | nd   |
| PFHxA   | 1.3   | 0.44  | 0.46 | 1.1  | 0.42 | 0.69  | 1.3  | 1.0   | 0.67 |
| PFHpA   | 0.69  | 0.47  | nd   | 0.42 | 0.32 | 0.25  | 0.38 | 0.63  | 0.32 |
| PFOA    | 2.8   | 1.4   | 1.1  | 2.2  | 1.2  | 1.3   | 1.2  | 1.7   | 1.1  |
| PFNA    | 0.56  | 0.34  | 0.23 | 0.74 | nd   | 0.31  | 0.40 | nd    | 0.26 |
| PFDcA   | 0.84  | 0.70  | nd   | 1.3  | nd   | nd    | 0.42 | 0.48  | nd   |
| PFUnA   | nd    | nd    | nd   | 0.25 | nd   | nd    | nd   | nd    | nd   |
| PFDoA   | 0.55  | nd    | nd   | nd   | 0.16 | nd    | nd   | 0.24  | nd   |
| PFOSA   | 0.33  | nd    | 0.20 | nd   | nd   | 0.3   | 0.19 | 0.28  | 0.22 |

**Pesticides ( $\mu\text{g}/\text{kg}_{\text{dw}}$ )**

|                          |     |     |     |     |     |     |     |     |     |
|--------------------------|-----|-----|-----|-----|-----|-----|-----|-----|-----|
| atrazine-2-hydroxy       | nd  |
| azaconazole              | 1.0 | nd  |
| azoxystrobin             | 3.1 | 3.2 | nd  | nd  | 2.1 | nd  | nd  | 1.0 | 5.1 |
| bitertanol               | nd  | 2.1 | nd  | 2.1 | nd  | 1.0 | nd  | nd  | 1.0 |
| bromacil                 | nd  |
| buprofezin               | nd  |
| carbendazim              | nd  | 5.1 |
| cyproconazole            | 3.1 | 8.4 | nd  | 1.1 | 1.0 | 2.1 | 1.1 | 1.0 | 1.0 |
| cyprodinil               | 1.0 | 2.1 | nd  | 3.2 | 6.2 | 2.1 | 1.1 | nd  | 4.1 |
| difenoconazole           | 5.2 | 6.3 | 2.1 | 5.3 | 4.1 | 4.1 | 4.2 | 2.1 | 5.1 |
| diuron                   | nd  | 1.0 |
| dimethomorph             | 2.1 | 1.1 | nd  |
| dodemorph                | nd  | 3.2 | nd  | 9.5 | 1.0 | 1.0 | 1.1 | nd  | 26  |
| epoxiconazole            | nd  | 1.0 | nd  |
| etaconazole              | nd  | 1.1 | nd  | nd  | 1.0 | nd  | nd  | nd  | nd  |
| fenbuconazole            | 7.3 | 11  | 16  | 2.1 | 1.0 | 4.1 | 4.2 | 2.1 | 3.1 |
| fenhexamide              | nd  | 1.1 | nd  | 1.1 | nd  | nd  | nd  | nd  | 13  |
| fenoxycarb               | nd  | 1.1 | nd  |
| fenpropathrin            | nd  | nd  | nd  | nd  | nd  | nd  | 1.1 | nd  | nd  |
| fenpropimorph            | nd  | 1.1 | nd  | 1.1 | nd  | nd  | nd  | nd  | 3.1 |
| fenpyroximat             | nd  | nd  | nd  | nd  | nd  | nd  | 2.1 | nd  | nd  |
| flusilazole              | 1.0 | 1.1 | nd  | 1.1 | 1.0 | 1.0 | nd  | 1.0 | 2.0 |
| flutolanil               | nd  | 1.1 | nd  | 1.1 | nd  | 1.0 | nd  | nd  | nd  |
| imazalil                 | 3.1 | 7.4 | nd  | 12  | nd  | 8.3 | 2.1 | nd  | 103 |
| mecoprop                 | nd  |
| metamitron               | nd  | 9.5 | nd  |
| methabenzthiazuron       | nd  | 1.0 |
| metolcarb                | nd  |
| myclobutanil             | 3.1 | 1.1 | 2.1 | 1.1 | nd  | 3.1 | 1.1 | nd  | 2.1 |
| oryzalin                 | 11  | 2.1 | nd  | nd  | nd  | 1.0 | nd  | nd  | 1.0 |
| oxadiazon                | 10  | 2.1 | nd  | nd  | nd  | 1.0 | nd  | nd  | 1.0 |
| oxadixyl                 | 15  | 18  | nd  |
| prochloraz               | nd  | 3.1 |
| propiconazole            | 2.1 | 5.3 | 3.1 | 5.3 | 2.1 | 6.2 | 2.1 | 2.1 | 10  |
| propoxur                 | 4.2 | 3.2 | 4.2 | 4.2 | 4.1 | 4.1 | 4.2 | 4.1 | 5.1 |
| propyzamide              | nd  | 4.1 |
| pyridaben                | nd  | nd  | nd  | nd  | nd  | nd  | 2.1 | nd  | nd  |
| pyrifenox                | 2.1 | 1.1 | nd  | nd  | 1.0 | nd  | 1.1 | nd  | nd  |
| pyrimethanil             | nd  |
| pyriproxyfen             | nd  | nd  | nd  | nd  | nd  | nd  | 1.1 | nd  | nd  |
| simazin                  | nd  |
| spiroxamine              | nd  | nd  | nd  | 2.1 | nd  | nd  | nd  | nd  | 6.1 |
| tebuconazole             | 2.1 | 2.1 | 3.1 | 5.3 | 2.1 | 5.2 | 8.4 | 1.0 | 4.1 |
| tebufenpyrad             | nd  |
| terbufeton               | nd  |
| terbuthylazine-2-hydroxy | 1.0 | 1.1 | nd  | nd  | nd  | nd  | 1.1 | nd  | nd  |
| terbutryn                | nd  | nd  | nd  | 1.1 | nd  | nd  | nd  | nd  | 1.0 |
| tetraconazole            | nd  | 1.0 |
| thiabendazole            | 2.1 | 3.2 | nd  | 7.4 | nd  | 7.2 | nd  | nd  | 19  |
| thiophanate ethyl        | nd  | nd  | nd  | nd  | 12  | nd  | nd  | nd  | nd  |
| triadimefon              | nd  | nd  | nd  | 1.1 | nd  | 1.0 | nd  | nd  | 3.1 |
| triadimenol              | 2.1 | 2.1 | 1.0 | 16  | 1.0 | 13  | 2.1 | 2.1 | 23  |
| triasulfuron             | nd  | 4.2 | nd  |

**Phthalates ( $\mu\text{g}/\text{kg}_{\text{dw}}$ )**

|    |    |    |    |    |    |    |    |    |    |
|----|----|----|----|----|----|----|----|----|----|
| na |
|----|----|----|----|----|----|----|----|----|----|

**Nonylphenol ( $\mu\text{g}/\text{kg}_{\text{dw}}$ )**

|    |    |    |    |    |    |    |    |    |    |
|----|----|----|----|----|----|----|----|----|----|
| na |
|----|----|----|----|----|----|----|----|----|----|

CP ( $\mu\text{g}/\text{kg}_{\text{dw}}$ )

na na na na na na na na na na

---

- a) Com: compost, Dig: digestate, all digestate samples were submitted to subsequent aerobic treatment except for samples 80
- b) plant code: C: compost, K: organic kitchen waste and green waste as input materials, G: pure green waste compost, U: urban area of input material collection, R: rural area of input material collection
- c) kw: kitchen waste, gw: green waste, iw: industrial waste including paper sludge, coffee ground, tea leaves, residues from potato chips production, biodegradable plastics, edible oil, cacao
- d) characterisation of the area where the input material was collected
- e) season of input material collection
- f) plant type: ab: aerated boxes, tad: thermophilic aerobic digestion, tbw: table windrows, twh: triangle windrows higher than 2 meters, twl: triangle windrows lower than 2 meters
- g) duration of the degradation process in days

6 FTS: fluorotelomer sulfonate, PFHxS: perfluorohexane sulfonate, PFOS: perfluorooctane sulfonate, PFDcS: perfluorodecane sulfonate, PFHxA: perfluorohexanoate, PFHpA: perfluoroheptanoate, PFOA: perfluorooctanoate, PFNA: perfluorononanoate, PFDcA: perfluorodecanoate, PFUnA: perfluoroundecanoate, PFDcA: perfluorododecanoate, PFOSA: perfluorooctane sulphonamide, na: not available, nd: not detected, ww: wet weight, dw: dry weight

PFAS below detection limit not listed, detection limit for 6:2 fluorotelomer unsaturated carboxylate (FTUCA):  $0.37\mu\text{g}/\text{kg dw}$ , 8:2 FTUCA:  $0.4\mu\text{g}/\text{kg}$ , 6:2 fluorotelomer carboxylate (FTCA):  $0.37\mu\text{g}/\text{kg}$ , 8:2 FTCA:  $0.4\mu\text{g}/\text{kg}$ , perfluorobutane sulfonate:  $0.33\mu\text{g}/\text{kg}$ , n-Methyl-heptadecafluorooctane sulphonamide:  $<0.18\mu\text{g}/\text{kg dw}$ , n-Ethyl-heptadecafluorooctane sulfonamide:  $<0.14\mu\text{g}/\text{kg dw}$ , n-Methyl-heptadecafluorooctane sulfonamidoethanol:  $<0.14\mu\text{g}/\text{kg dw}$ , n-Ethyl-heptadecafluorooctane sulfonamidoethanol:  $<0.28\mu\text{g}/\text{kg dw}$

Table S3: Aerial deposition rates of organic pollutants and their content in manure and sewage sludge

|           | deposition rate (min, max)          | ref  | manure (min, max)                            | ref    | sewage sludge (min, max)                                 | ref |
|-----------|-------------------------------------|------|----------------------------------------------|--------|----------------------------------------------------------|-----|
| Σ17PCDD/F | 22 µg I-TEQ/ha/y<br>(7, 40)         | 3, 4 | 3.77 ng I-TEQ/kg <sub>dw</sub><br>(0.36, 21) | 5      | 15 ng I-TEQ/kg <sub>dw</sub><br>(6.1, 120 <sup>a</sup> ) | 6   |
| DL-PCB    | 9 µg WHO-TEQ/ha/y<br>(7;10)         | 4    | na                                           |        | 4.2 ng WHO-TEQ/kg <sub>dw</sub><br>(1.9, 6.6)            | 7   |
| ΣBDE      | 6.2 mg/ha/y<br>(only one datapoint) | 8    | na                                           |        | 1170 µg/kg <sub>dw</sub><br>(250, 1800)                  | 9   |
| HBCD      | 284 mg/ha/y<br>(0.073-1340)         | 10   | na                                           |        | 1730 µg/kg <sub>dw</sub><br>(1, 5200)                    | 11  |
| PFS       | na                                  |      | na                                           |        | 395 µg/kg <sub>dw</sub><br>(31, 3040)                    | 12  |
| PFCA      | na                                  |      | na                                           |        | 30 µg/kg <sub>dw</sub><br>(5, 150)                       | 12  |
| DEHP      | 0.19 g/ha/y<br>(0-2.5)              | 13   | 6.8 mg/kg <sub>dw</sub><br>(0.41, 26)        | 14, 15 | 51 mg/kg <sub>dw</sub><br>(21, 110)                      | 16  |

na: not available

a) highest value not taken into account

Table S4: Pesticides analysed and detected in Swiss compost and digestate

| Pesticides analysed       |             | detection <sup>a</sup> | Pesticides analysed |             | detection <sup>a</sup> |
|---------------------------|-------------|------------------------|---------------------|-------------|------------------------|
| Acephate                  | Insecticide | 2                      | Haloxypop-methyl    | Herbicide   | 2                      |
| Acetamiprid               | Insecticide | 2                      | Hexachlorbenzene    | Fungicide   | 2                      |
| Acetochlor                | Herbicide   | 2                      | Hexaconazole        | Fungicide   | 2                      |
| Alachlor                  | Herbicide   | 2                      | Hexaflumuron        | Insecticide | 2                      |
| Aldicarb                  | Insecticide | 2                      | Hexythiazox         | Insecticide | 2                      |
| Aldicarb sulfoxide        | Insecticide | 2                      | Imazalil            | Fungicide   | 1                      |
| Aldoxycarb                | Insecticide | 2                      | Imidacloprid        | Insecticide | 2                      |
| alpha Endosulfan          | Insecticide | 2                      | Indoxacarb          | Insecticide | 2                      |
| Amidosulfuron             | Herbicide   | 2                      | Iodosulfuron        | Herbicide   | 2                      |
| Amitrole                  | Herbicide   | 2                      | Ioxynil             | Herbicide   | 2                      |
| Anilazine                 | Fungicide   | 2                      | Iprodione           | Fungicide   | 2                      |
| Asulam                    | Herbicide   | 2                      | Iprovalicarb        | Fungicide   | 2                      |
| Atrazine                  | Herbicide   | 2                      | Isazophos           | Insecticide | 2                      |
| Atrazine-2-hydroxy        | Herbicide   | 1                      | Isoproturon         | Herbicide   | 2                      |
| Atrazine-desethyl         | Herbicide   | 2                      | Kresoxym methyl     | Fungicide   | 2                      |
| Atrazine-desisopropyl     | Herbicide   | 2                      | Lenacil             | Herbicide   | 2                      |
| Azaconazole               | Fungicide   | 1                      | Lindane and isomers | Insecticide | 2                      |
| Azamethiphos              | Insecticide | 2                      | Linuron             | Herbicide   | 2                      |
| Azinphos methyl           | Insecticide | 2                      | Lufenuron           | Insecticide | 2                      |
| Aziprotryne               | Herbicide   | 2                      | Malathion           | Insecticide | 2                      |
| Azoxystrobin              | Fungicide   | 1                      | MCPA                | Herbicide   | 2                      |
| Benalaxyl                 | Fungicide   | 2                      | MCPB                | Herbicide   | 2                      |
| Bendiocarb                | Insecticide | 2                      | Mecarbam            | Insecticide | 2                      |
| Benfuracarb               | Insecticide | 2                      | Mecoprop            | Herbicide   | 1                      |
| Benodanil                 | Fungicide   | 2                      | Mepanipyrim         | Fungicide   | 2                      |
| Benomyl                   | Fungicide   | 2                      | Metalaxyl           | Fungicide   | 1                      |
| Bentazone                 | Herbicide   | 2                      | Metamitron          | Herbicide   | 2                      |
| Benthiavalicarb isopropyl | Fungicide   | 2                      | Metconazole         | Fungicide   | 2                      |
| Benzoximate               | Acaricide   | 2                      | Methabenzthiazuron  | Herbicide   | 1                      |
| beta Endosulfan           | Insecticide | 2                      | Methidathion        | Insecticide | 2                      |
| Bifenox                   | Herbicide   | 2                      | Methiocarb          | Insecticide | 2                      |
| Bitertanol                | Fungicide   | 1                      | Methomyl            | Insecticide | 2                      |
| Boscalid                  | Fungicide   | 2                      | Methoxyfenozide     | Insecticide | 2                      |
| Bromacil                  | Herbicide   | 1                      | Metobromuron        | Herbicide   | 2                      |
| Bromophos ethyl           | Insecticide | 2                      | Metolachlor         | Herbicide   | 2                      |
| Bromopropylate            | Insecticide | 2                      | Metolcarb           | Insecticide | 1                      |
| Bromuconazole             | Fungicide   | 2                      | Metoxuron           | Herbicide   | 2                      |
| Bupirimate                | Fungicide   | 2                      | Metribuzin          | Herbicide   | 2                      |
| Buprofezin                | Insecticide | 1                      | Metsulfuron-methyl  | Herbicide   | 2                      |
| Butocarboxim              | Insecticide | 2                      | Mevinphos           | Insecticide | 2                      |
| Captan                    | Fungicide   | 2                      | Monocrotophos       | Insecticide | 2                      |
| Carbaryl                  | Insecticide | 2                      | Monolinuron         | Herbicide   | 2                      |
| Carbendazim               | Fungicide   | 1                      | Monuron             | Herbicide   | 2                      |
| Carbofuran                | Insecticide | 2                      | Myclobutanil        | Fungicide   | 1                      |
| Carboxin                  | Fungicide   | 2                      | Napropamid          | Herbicide   | 2                      |
| Chlorbromuron             | Herbicide   | 2                      | Norflurazon         | Herbicide   | 2                      |
| Chlorfenapyr              | Insecticide | 2                      | Nuarimol            | Fungicide   | 2                      |
| Chlorfenvinphos           | Insecticide | 2                      | Omethoate           | Insecticide | 2                      |
| Chlorfluaazuron           | Insecticide | 2                      | Orbencarb           | Herbicide   | 2                      |
| Chloridazon               | Herbicide   | 2                      | Orthosulfamuron     | herbicide   | 2                      |
| Chlorothalonil            | Fungicide   | 2                      | Oryzalin            | Herbicide   | 1                      |
| Chlorotoluron             | Herbicide   | 2                      | Oxadiazon           | Herbicide   | 1                      |
| Chloroxuron               | Herbicide   | 2                      | Oxadixyl            | Fungicide   | 1                      |
| Chlorpropham              | Herbicide   | 2                      | Oxamyl              | Insecticide | 2                      |
| Chlorpyrifos              | Insecticide | 2                      | Parathion           | Insecticide | 2                      |
| Chlorpyrifos methyl       | Insecticide | 2                      | Parathion methyl    | Insecticide | 2                      |
| Chlozolinate              | Fungicide   | 2                      | Penconazole         | Fungicide   | 2                      |
| Clofentezine              | acaricide   | 2                      | Pencycuron          | Fungicide   | 2                      |
| Clopyralid                | Herbicide   | 2                      | Pendimethalin       | Herbicide   | 2                      |



|                          |             |   |                          |             |   |
|--------------------------|-------------|---|--------------------------|-------------|---|
| Cyanazin                 | Herbicide   | 2 | Phenmedipham             | Herbicide   | 2 |
| Cycloxydim               | Herbicide   | 2 | Phenthoate               | Insecticide | 2 |
| Cymoxanil                | Fungicide   | 2 | Phosalone                | Insecticide | 2 |
| Cyproconazole            | Fungicide   | 1 | Phosphamidon             | Insecticide | 2 |
| Cyprodinil               | Fungicide   | 1 | Pirimicarb               | Insecticide | 2 |
| DDT and isomers          | Insecticide | 2 | Pirimiphos methyl        | Insecticide | 2 |
| Demeton-S-methyl         | Insecticide | 2 | Prochloraz               | Fungicide   | 1 |
| Diafenthiuron            | Insecticide | 2 | Procymidone              | Fungicide   | 2 |
| Diazinon                 | Insecticide | 2 | Promecarb                | Insecticide | 2 |
| Dichlofenthion           | Insecticide | 2 | Prometryn                | Herbicide   | 2 |
| Dichlofluanid            | Fungicide   | 2 | Propachlor               | Herbicide   | 2 |
| Dichlorprop-methyl ester | Herbicide   | 2 | Propamocarb              | Fungicide   | 2 |
| Dichlorprop-P            | Herbicide   | 2 | Propanil                 | Herbicide   | 2 |
| Diclobutrazol            | Fungicide   | 2 | Propaquizafop            | Herbicide   | 2 |
| Dicofol                  | Insecticide | 2 | Propazine                | Herbicide   | 2 |
| Dicrotophos              | Insecticide | 2 | Propetamphos             | Insecticide | 2 |
| Diethofencarb            | Fungicide   | 2 | Propham                  | Herbicide   | 2 |
| Difenoconazol            | Fungicide   | 1 | Propiconazole            | Fungicide   | 1 |
| Difenoxuron              | Herbicide   | 2 | Propoxur                 | Insecticide | 1 |
| Diflubenzuron            | Insecticide | 2 | Propyzamide              | Herbicide   | 1 |
| Dimefuron                | Herbicide   | 2 | Prosulfocarb             | Herbicide   | 2 |
| Dimethachlor             | Herbicide   | 2 | Pymetrozine              | Insecticide | 2 |
| Dimethenamid             | Herbicide   | 2 | Pyridaben                | Insecticide | 1 |
| Dimethoate               | Insecticide | 2 | Pyridate                 | Herbicide   | 2 |
| Dimethomorph             | Fungicide   | 1 | Pyrifenoxy               | Fungicide   | 1 |
| Dimetilan                | Insecticide | 2 | Pyrimethanil             | Fungicide   | 1 |
| Diniconazole             | Fungicide   | 2 | Pyriproxyfen             | Insecticide | 1 |
| Dinocap                  | Fungicide   | 2 | Quinalphos               | Insecticide | 2 |
| Dinoseb                  | Herbicide   | 2 | Quintozene               | Herbicide   | 2 |
| Dinoterb                 | Herbicide   | 2 | Quizalofop-P-Ethyl       | Herbicide   | 2 |
| Dioxacarb                | Insecticide | 2 | Simazin                  | Herbicide   | 1 |
| Diphenylamine            | Fungicide   | 2 | Simazin-2-hydroxy        | Herbicide   | 2 |
| Disulfoton               | Insecticide | 2 | Soufre                   | Fungicide   | 2 |
| Diuron                   | Herbicide   | 1 | Spinosad                 | Insecticide | 2 |
| Dodemorph                | Fungicide   | 1 | Spirodiclofen            | Insecticide | 2 |
| Endosulfan sulfate       | Insecticide | 2 | Spiroxamine              | Fungicide   | 1 |
| Epoxiconazole            | Fungicide   | 1 | Tebuconazole             | Fungicide   | 1 |
| Etaconazole              | Fungicide   | 1 | Tebufenozide             | Insecticide | 2 |
| Ethiofencarb             | Insecticide | 2 | Tebufenpyrad             | Insecticide | 1 |
| Ethion                   | Insecticide | 2 | Tebutam                  | Herbicide   | 2 |
| Ethoxyquin               | Fungicide   | 2 | Teflubenzuron            | Insecticide | 2 |
| Ethoxysulfuron           | herbicide   | 2 | Tepraloxymid             | Herbicide   | 2 |
| Etrifos                  | Insecticide | 2 | Terbacil                 | Herbicide   | 2 |
| Fenamidone               | Fungicide   | 2 | Terbufos                 | Insecticide | 2 |
| Fenamiphos               | nematicide  | 2 | Terbumeton               | Herbicide   | 1 |
| Fenarimol                | Fungicide   | 2 | Terbuthylazine-2-hydroxy | Herbicide   | 1 |
| Fenazaquin               | Acaricide   | 2 | Terbuthylazine-desethyl  | Herbicide   | 2 |
| Fenbuconazole            | Fungicide   | 1 | Terbutryn                | Herbicide   | 1 |
| Fenhexamide              | Fungicide   | 1 | Tetraconazole            | Fungicide   | 1 |
| Fenitrothion             | Insecticide | 2 | Thiabendazole            | Fungicide   | 1 |
| Fenoxycarb               | Insecticide | 1 | Thiacloprid              | Insecticide | 2 |
| Fenpiclonil              | Fungicide   | 2 | Thiamethoxam             | Insecticide | 2 |
| Fenpropathrin            | Fungicide   | 1 | Thifensulfuron-methyl    | Herbicide   | 2 |
| Fenpropidin              | Fungicide   | 2 | Thiobencarb              | Herbicide   | 2 |
| Fenpropimorph            | Insecticide | 1 | Thiocyclam               | Insecticide | 2 |
| Fenpyroximat             | Acaricide   | 1 | Thiodicarb               | Insecticide | 2 |
| Fenthion                 | Insecticide | 2 | Thiofanox                | Insecticide | 2 |
| Fenuron                  | Herbicide   | 2 | Thiometon                | Insecticide | 2 |
| Fipronil                 | Insecticide | 2 | Thiophanate ethyl        | Fungicide   | 1 |
| Fluazifop-butyl          | Herbicide   | 2 | Thiophanate methyl       | Fungicide   | 2 |
| Fluazinam                | Fungicide   | 2 | Tolclofos-methyl         | Fungicide   | 2 |

|                 |             |   |                 |             |   |
|-----------------|-------------|---|-----------------|-------------|---|
| Flucycloxuron   | Acaricide   | 2 | Tolyfluanid     | Fungicide   | 2 |
| Fludioxonil     | Fungicide   | 2 | Triadimefon     | Fungicide   | 1 |
| Flufenoxuron    | Insecticide | 2 | Triadimenol     | Fungicide   | 1 |
| Fluquinconazole | Fungicide   | 2 | Triasulfuron    | Herbicide   | 1 |
| Fluroxypyr      | herbicide   | 2 | Triclopyr       | Herbicide   | 2 |
| Flurprimidol    | Fungicide   | 2 | Tricyclazole    | Fungicide   | 2 |
| Flusilazole     | Fungicide   | 1 | Tridemorph      | Fungicide   | 2 |
| Flutolanil      | Fungicide   | 1 | Trifloxystrobin | Fungicide   | 2 |
| Flutriafol      | Fungicide   | 2 | Triflumizole    | Fungicide   | 2 |
| Folpet          | Fungicide   | 2 | Triflumuron     | Insecticide | 2 |
| Foramsulfuron   | Herbicide   | 2 | Trifluralin     | Herbicide   | 2 |
| Formothion      | Insecticide | 2 | Triforine       | Fungicide   | 2 |
| Fuberidazole    | Fungicide   | 2 | Vamidothion     | Insecticide | 2 |
| Furalaxyl       | Fungicide   | 2 | Vinclozolin     | Fungicide   | 2 |
| Furathiocarb    | Insecticide | 2 |                 |             |   |

a) 1: detected at least once in compost and/or digestate, 2: not detected in compost and/or digestate, detection limit 1.0 µg/kg<sub>dw</sub>

## References

- 1 Hogg, D.; Barth, J.; Favoino, E.; Centemero, M.; Caimi, V.; Amlinger, F.; Devliegher, W.; Brinton, W., and Antler, S. *Comparison of Compost Standards Within the EU, North America and Australasia. Main Report*. The Waste and Resources Action Programme (WRAP); Banbury UK, 2002.
- 2 Swiss Confederation, *Ordinance of 18 May 2005 on the Reductions of Risks linked to Chemical Products (ORRChem)*, Swiss Confederation, Bern, 2005.
- 3 L. Van Lieshout, M. Desmedt, E. Roekens, R. De Fre, R. Van Cleuvenbergen and M. Wevers, *Atmos. Environ.*, 2001, **35**, 83-90.
- 4 P. Rossini, A. De Lazzari, S. Guerzoni, E. Molinaroli, G. Rampazzo and A. Zancanaro, *Ann. Chim.*, 2001, **91**, 491-501.
- 5 J. L. Stevens and K. C. Jones, *Chemosphere*, 2003, **50**, 1183-1191.
- 6 C. Rappe, R. Andersson, C. Studer and G. Karlaganis, *Organohalogen Compounds*, 1997, **33**.
- 7 E. Eljarrat, J. Caixach and J. Rivera, *Chemosphere*, 2003, **51**, 595-601.
- 8 A. F. H. Ter Schure and P. Larsson, *Atmos. Environ.*, 2002, **36**, 4015-4022.
- 9 M. Kohler, M. Zennegg, A. Gereke, P. Schmid and N. Heeb, *Organohalogen Compounds*, 2003, **61**, 123-126.
- 10 M. Remberger, J. Sternbeck, A. Palm, L. Kaj, K. Stromberg and E. Brorstrom-Lunden, *Chemosphere*, 2004, **54**, 9-21.
- 11 A. Covaci, A. C. Gerecke, R. J. Law, S. Voorspoels, M. Kohler, N. V. Heeb, H. Leslie, C. R. Allchin and J. De Boer, *Environ. Sci. Technol.*, 2006, **40**, 3679-3688.
- 12 C. P. Higgins, J. A. Field, C. S. Criddle and R. G. Luthy, *Environ. Sci. Technol.*, 2005, **39**, 3946-3956.
- 13 Z. Y. Xie, R. Ebinghaus, C. Temme, A. Caba and W. Ruck, *Atmos. Environ.*, 2005, **39**, 3209-3219.
- 14 B. Paulsrud, A. Wien and K. T. Nedland, *A survey of toxic organics in Norwegian sewage sludge, compost and manure*, Aquateam, Norwegian Water Technology Centre ASOSLO, Oslo, 2000.
- 15 H. Fromme, T. Kuchler, T. Otto, K. Pilz, J. Muller and A. Wenzel, *Water Res.*, 2002, **36**, 1429-1438.
- 16 J. D. Berset and R. Etter-Holzer, *Journal of Aoac International*, 2001, **84**, 383-391.
